# Supplementary material for: Effects of the aspect ratio of the conductive agent on the kinetic properties of lithium ion batteries
Source: Royal Society of Chemistry journal article supplement (doi:10.1039/c9ra09609d), 2019-01-01
Supplement: c9ra09609d1.pdf [file c9ra09609d1.pdf]

## Supporting information

### **Effects of the aspect ratio of conductive agent on the kinetic properties of lithium ion battery**

Hyeonjun Song<sup>a</sup>, Yeonjae Oh<sup>a</sup>, Cakmakci Nilufer<sup>b</sup>, and Youngjin Jeong<sup>a, b, \*</sup>

<sup>a</sup>Department of Information Communication, Materials, and Chemistry Convergence Technology, Soongsil University, Seoul 156-743, Korea.

<sup>b</sup>Department of Organic Materials and Fiber Engineering, Soongsil University, Seoul 156-743, Korea.

Corresponding author. Tel: +82-2-820-0667. E-mail: yjeong@ssu.ac.kr (Y. Jeong)

Hyeonjun Song and Yeonjae Oh contributed equally to this work.

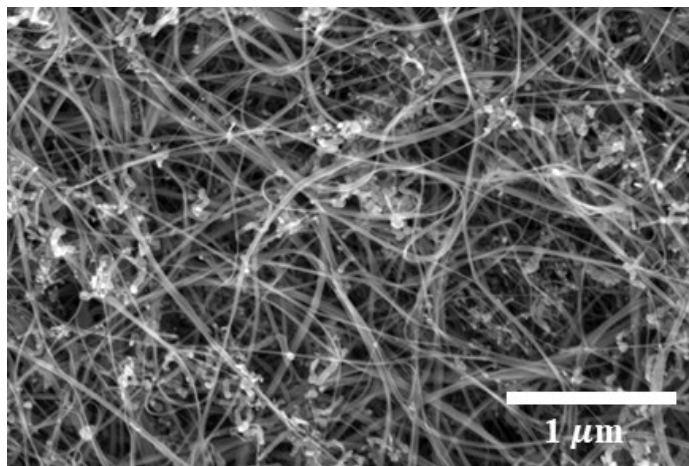

**Fig. S1.** The SEM image of the CNT film, which used as current collector. The CNT film has rough surface and it makes a robust adhesion between CNT film and active materials
